# Supplementary material
Source: Springer Nature journal article supplement (https://www.springermedizin.de/resource/supplementary/13075_2011_3648_MOESM4_ESM.pdf/9694954)

**A**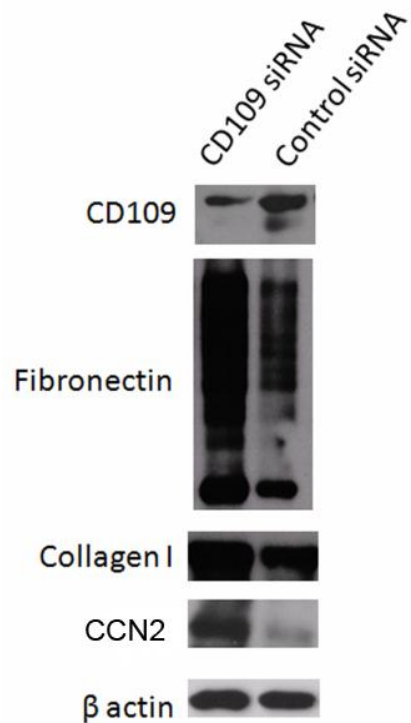

SSc  
(S2)

**B**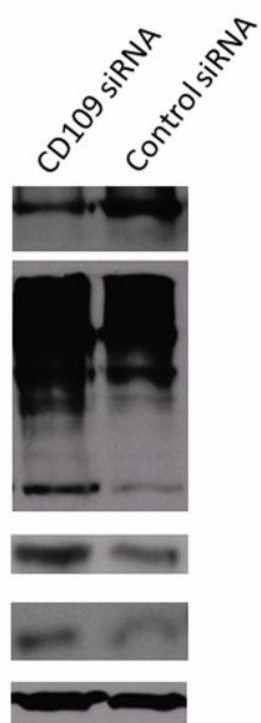

normal

**C**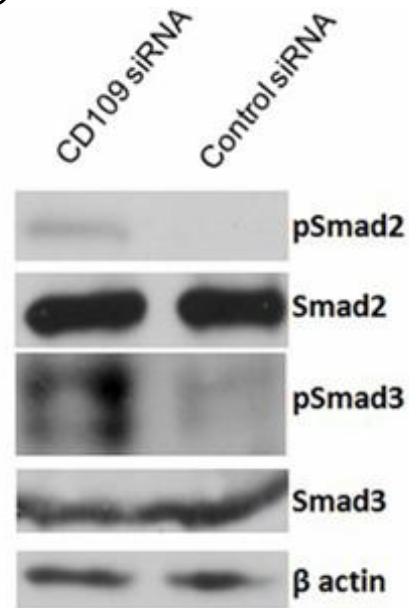

SSc  
(S16)

**D**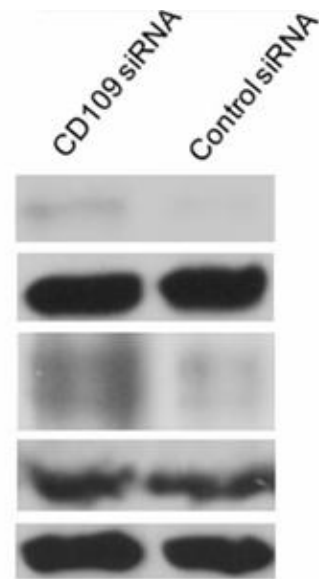

normal

Supplement: MOESM4 [file 9694954]
